# Supplementary material for: Understanding the multiple orientations of isolated superellipsoidal hematite particles at the oil–water interface
Source: Royal Society of Chemistry journal article supplement (doi:10.1039/c2sm26556g), 2012-10-26
Supplement: c2sm26556g.pdf [file c2sm26556g.pdf]

## **Supporting Information**

**For**

### **Understanding the Multiple Orientations of Isolated Superellipsoidal Hematite Particles at the Oil-Water Interface**

*Adam R. Morgan, Nicholas Ballard, Luke A. Rochford, Gabit Nurumbetov, Thomas S. Skelhon, Stefan A.F. Bon\**

[\*] dr.ir. Stefan A. F. Bon  
Department of Chemistry  
The University of Warwick, CV4 7AL (United Kingdom)  
E-mail: (s.bon@warwick.ac.uk)  
Web: [www.bonlab.info](http://www.bonlab.info)  
Twitter: bonlab  
Youtube: [www.youtube.com/bonlabTV](http://www.youtube.com/bonlabTV)

## Experimental Details

### *Materials*

Reagent grade iron(III) chloride hexahydrate, hexadecane, methanol, sodium hydroxide, phytigel, PDMS (200 fluid, 10cSt), and PVP-K30 (40,000 g mol<sup>-1</sup>) were all used as received from Sigma Aldrich. Phytigel was obtained from Sigma Aldrich. Deionized water was produced by a Milli-Q purification unit with a conductivity of 18MΩ. Beer bottles and their swing tops were obtained from JBC glassware.

### *Preparation of Hematite Superellipsoids*

Superellipsoidal hematite particles were prepared by the route originally described by Muramatsu.<sup>[1]</sup> Iron(III) chloride hexahydrate (2.0M, 100mL) was added to a 200mL beer bottle fitted with a ceramic swing top, and sealed with a Teflon-lined rubber seal. Sodium hydroxide solution (6.0M, 90mL) was slowly fed into the iron chloride solution under vigorous stirring over a period of 5 minutes before a small aliquot of deionized water (10mL) was added. The bottle was sealed and transferred to an oven at 100°C where it was left for 8 days.

The amber-colored supernatant was removed and the sediment re-dispersed in water before 3 rounds of centrifugation at 2000rpm, re-dispersing in water each time. PVP-K30 (10.0g) was added and the solution was allowed to stir for 48 hours to ensure complete absorption before they were cleaned by a further 3 rounds of centrifugation/dispersion in water, and drying in an oven under vacuum at 60°C for 48 hours.

### *Assembly and Immobilisation of Particle onto the Oil-Water Interface*

A 2.0 wt% solution of phytigel was made up by dissolving in water at 80°C with vigorous stirring, and then left to cool to 50°C with light stirring, until no bubbles remained in the system. This solution was placed in a Petri dish and n-hexadecane at 50°C was layered on top. 100µl of a 1.0 wt% hematite particle suspension in isopropanol was injected at the oil-water interface by syringe, and the Petri dish was left to cool for 30 minutes at room temperature until the aqueous phase gelled. The oil layer was gently removed by pipette and replaced by a Sylgard 184 elastomer at a mass ratio of 9:1 PDMS:curing agent ratio, which had previously been degassed in a vacuum. The liquid PDMS was gently poured over the gel surface and left to cure for 2 days at room temperature. At this point the PDMS layer was peeled from the hydrogel surface and immersed in hot water for two minutes to remove any residual phytigel.

#### *Imaging of Trapped Hematite Particles*

Squares of PDMS (1cm x 1cm) were cut before cleaning in boiling deionized water for 2 minutes.

Atomic force microscopy (AFM) images were obtained using an Asylum Research MFP-3D (Santa Barbara, USA) in AC mode using AC240TS cantilevers (Olympus).

SEM sample were prepared by sputter-coating PDMS squares with platinum at a 45° angle. An operating voltage of 15kV was used, calculated to give a surface thickness of 5nm. Imaging was performed at a 14.1° angle with respect to the plane of the interface on a Zeiss Supra 55VP SEM, operated at 10kV. Particle sizes were averaged over 100 isolated particles. A simple trigonometric correction factor was applied when measuring particle height in order to account for the tilt of the stage.

#### *MATLAB Simulations of Stable Particle Orientations*

Simulations were performed in Matlab using a triangular tessellation method similar to that described by van Roij *et al.*<sup>[2]</sup> The particles are created from a series of points which all fit the unique expression for a superellipsoid (**Equation 1**).

$$\left(\frac{x^{2/n_2}}{r_x} + \frac{y^{2/n_2}}{r_y}\right)^{n_2/n_1} + \frac{z^{2/n_1}}{r_z} = 1 \quad (1)$$

Where  $x$ ,  $y$ , and  $z$  denote the coordinates of the point  $r_x$ ,  $r_y$ , and  $r_z$ , which are the particles  $x$ ,  $y$ , and  $z$  radii.  $n_1$  and  $n_2$  act as the "squareness" parameters in the  $z$  axis and the  $x$ - $y$  plane respectively, with  $0 < n_1, n_2 < \infty$ . From the input parameters of  $r_x$ ,  $r_y$ ,  $r_z$ ,  $n_1$ ,  $n_2$ , and the number of points to be created, the particle shape is computed. The point coordinates are obtained by first generating an evenly distributed set of points around a sphere with  $r_x = r_y = r_z = 1$  using the golden section spiral method. The  $x$ ,  $y$ , and  $z$  coordinates from the sphere are converted into spherical coordinates and the  $x$ ,  $y$ , and  $z$  values for the superellipsoid are calculated from the parametric equations (**Equation 2-4**)

$$x = r_x \cos^{n_1} \theta \cos^{n_2} \varphi \quad (2)$$

$$y = r_y \cos^{n_1} \theta \sin^{n_2} \varphi \quad (3)$$

$$z = r_z \sin^{n_1} \theta \quad (4)$$

The surface of the particle is obtained from this set of data points by taking the convex hull of the data set, resulting in a series of triangles that connect the points.

The surface created by the above equation is bound by a sphere of minimum radius ( $R$ ) centered at the origin which can be rotated about the  $x$  ( $\theta_2$ ) and  $y$  ( $\theta_1$ ) axes, and translated in the  $z$  axis to give any position and orientation of the particle with respect to the interface. The particle movement in the  $z$  axis is defined by the vertical coordinate  $\check{z}$  (**Equation 5**).

$$\check{z} = z/R \quad (5)$$

Where  $z$  is the distance from the center of the sphere bounding the particle to the interface, and  $R$  is the radius of the bounding sphere (where  $\check{z}=1$  the particle is in the oil phase and where  $\check{z}=-1$  is in the water phase). The particle is scanned through various positions by translating and rotating the points, and at each position the associated energy is calculated. The energy is calculated by summing the area of triangles above and below the interface and multiplying by the interfacial tension. Triangles which intersect the interface are subdivided further and the new triangles are designated into the appropriate phase in a method analogous to that of van Roij *et al.* The area of the interface that is ‘removed’ upon adsorption of the particle is determined by connecting the points where lines from the triangular tessellation intersect the liquid-liquid interface and then the areas of the described polygon is calculated. This can be summarized mathematically (**Equation 6**).

$$E = S_{P1}A_{P1} + S_{P2}A_{P2} - S_{12}A_{12} \quad (6)$$

Where  $E$  is the energy  $S$  is the surface tension and  $A$  is the area. The subscripts  $P1$ ,  $P2$  and  $12$  denote the particle-oil interface, particle-water interface and oil-water interface respectively. Particle trajectories and transitions between states were calculated by taking the negative gradient at each point in the 3-dimensional free energy landscape (**Equation 7**) calculated in the above section.

$$-\nabla E(\theta_1, \theta_2, z) = -\left(\frac{d\theta_1}{dE} + \frac{d\theta_2}{dE} + \frac{dz}{dE}\right) \quad (7)$$

Trajectories that follow the path of the steepest descent in terms of energy from an initial point  $P^0(\theta_1^0, \theta_2^0, z^0)$  are calculated by interpolating between the values of the recorded

gradient and using the constituent  $d\theta_1$ ,  $d\theta_2$ , and  $dz$  values to determine direction of the particle motion. A zero temperature string method was used to find pathways with an energy barrier, which allows one to calculate the minimum energy pathway between two energy minima.<sup>[3]</sup>

### Particle Size Distribution Measurements with Mie Scattering

A Malvern Mastersizer Hydro 2000S was used to measure the particle size and particle size distribution (**Figure 1**). The number average particle size was  $1.159\mu\text{m}$  and the polydispersity was 0.225.

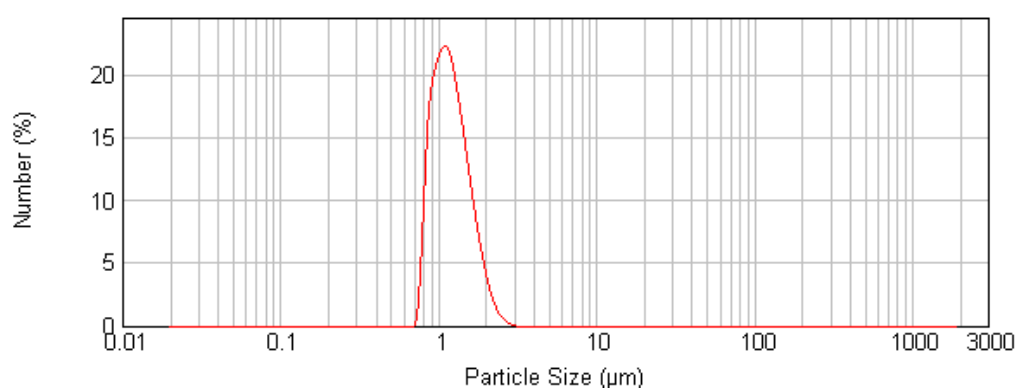

**Figure 1.** Dynamic Light Scattering Measurement shows a monomodal size distribution of the hematite particles.

### SEM Image Analysis of Particles

Hematite superellipsoids were analyzed by SEM to determine the characteristic length and polydispersity (**Figure 2**). Over 100 particles the characteristic length was  $1.361\mu\text{m} \pm 0.124$ . Deviations from the mean were within 9%.

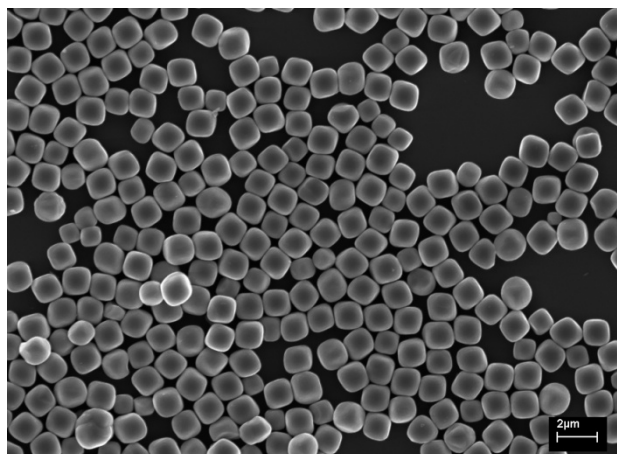

**Figure 2.** SEM image showing monodisperse hematite particles. Scale bar is 2 $\mu$ m.

All SEM images analyzed can be found in the corresponding .ZIP file accompanying this supporting information. Some images were used to analyze more than one particle.

The results of SEM image analysis of all 100 particles can be found below. Note that the perceived height was obtained by measuring the distance from the highest point on the particle to the plane of the PDMS interface using the software ImageJ. Height corrections were made through simple trigonometric calculations to account for differences in the apparent height and actual height due to the viewing angle of the detector, which was 14.1°

| <i>Particle Number</i> | <i>File Name</i> | <i>Orientation</i> | <i>Perceived Height (nm)</i> | <i>Corrected Height (nm)</i> |
|------------------------|------------------|--------------------|------------------------------|------------------------------|
| 1                      | Hematite 001     | Tilted             | 837                          | 863                          |
| 2                      | Hematite 002     | Tilted             | 756                          | 780                          |
| 3                      | Hematite 003     | Tilted             | 867                          | 894                          |
| 4                      | Hematite 004     | Tilted             | 811                          | 836                          |

|    |                        |                                  |      |      |
|----|------------------------|----------------------------------|------|------|
| 5  | <i>Hematite</i><br>005 | <i>Flat</i>                      | 1000 | 1031 |
| 6  | <i>Hematite</i><br>006 | <i>Flat</i>                      | 1061 | 1094 |
| 7  | <i>Hematite</i><br>007 | <i>Tilted</i>                    | 914  | 942  |
| 8  | <i>Hematite</i><br>008 | <i>Tilted and</i><br><i>Sunk</i> | 514  | 530  |
| 9  | <i>Hematite</i><br>009 | <i>Flat</i>                      | 1062 | 1095 |
| 10 | <i>Hematite</i><br>010 | <i>Flat</i>                      | 1057 | 1090 |
| 11 | <i>Hematite</i><br>011 | <i>Flat</i>                      | 979  | 1009 |
| 12 | <i>Hematite</i><br>012 | <i>Flat</i>                      | 952  | 982  |
| 13 | <i>Hematite</i><br>013 | <i>Tilted</i>                    | 865  | 892  |
| 14 | <i>Hematite</i><br>014 | <i>Flat</i>                      | 1033 | 1065 |
| 15 | <i>Hematite</i><br>015 | <i>Tilted</i>                    | 850  | 876  |
| 16 | <i>Hematite</i><br>016 | <i>Flat</i>                      | 1035 | 1067 |
| 17 | <i>Hematite</i>        | <i>Flat</i>                      | 726  | 749  |



|    |                 |                    |      |      |
|----|-----------------|--------------------|------|------|
|    | 017             |                    |      |      |
| 18 | Hematite<br>018 | Tilted and<br>Sunk | 495  | 510  |
| 19 | Hematite<br>019 | Flat               | 1079 | 1113 |
| 20 | Hematite<br>020 | Tilted             | 759  | 783  |
| 21 | Hematite<br>021 | Flat               | 1049 | 1082 |
| 22 | Hematite<br>022 | Flat               | 1082 | 1116 |
| 23 | Hematite<br>023 | Flat               | 1068 | 1101 |
| 24 | Hematite<br>024 | Flat               | 1032 | 1064 |
| 25 | Hematite<br>025 | Tilted             | 932  | 961  |
| 26 | Hematite<br>026 | Tilted             | 900  | 928  |
| 27 | Hematite<br>027 | Tilted             | 838  | 864  |
| 28 | Hematite<br>028 | Flat               | 1022 | 1054 |
| 29 | Hematite<br>029 | Flat               | 995  | 1026 |

|    |                        |               |      |      |
|----|------------------------|---------------|------|------|
| 30 | <i>Hematite</i><br>030 | <i>Flat</i>   | 1023 | 1055 |
| 31 | <i>Hematite</i><br>031 | <i>Flat</i>   | 1042 | 1074 |
| 32 | <i>Hematite</i><br>032 | <i>Flat</i>   | 952  | 982  |
| 33 | <i>Hematite</i><br>033 | <i>Flat</i>   | 851  | 878  |
| 34 | <i>Hematite</i><br>034 | <i>Flat</i>   | 1002 | 1033 |
| 35 | <i>Hematite</i><br>035 | <i>Tilted</i> | 917  | 946  |
| 36 | <i>Hematite</i><br>036 | <i>Flat</i>   | 1103 | 1137 |
| 37 | <i>Hematite</i><br>037 | <i>Flat</i>   | 1044 | 1077 |
| 38 | <i>Hematite</i><br>038 | <i>Tilted</i> | 910  | 938  |
| 39 | <i>Hematite</i><br>039 | <i>Tilted</i> | 778  | 802  |
| 40 | <i>Hematite</i><br>040 | <i>Tilted</i> | 710  | 732  |
| 41 | <i>Hematite</i><br>041 | <i>Flat</i>   | 1064 | 1097 |
| 42 | <i>Hematite</i>        | <i>Tilted</i> | 785  | 809  |

|    |                 |        |      |      |
|----|-----------------|--------|------|------|
|    | 042             |        |      |      |
| 43 | Hematite<br>043 | Flat   | 1082 | 1116 |
| 44 | Hematite<br>044 | Tilted | 902  | 930  |
| 45 | Hematite<br>045 | Flat   | 1013 | 1045 |
| 46 | Hematite<br>046 | Flat   | 1001 | 1032 |
| 47 | Hematite<br>047 | Flat   | 1006 | 1037 |
| 48 | Hematite<br>048 | Tilted | 896  | 924  |
| 49 | Hematite<br>049 | Tilted | 881  | 908  |
| 50 | Hematite<br>050 | Tilted | 847  | 873  |
| 51 | Hematite<br>051 | Tilted | 939  | 968  |
| 52 | Hematite<br>052 | Flat   | 1010 | 1041 |
| 53 | Hematite<br>053 | Flat   | 1080 | 1114 |
| 54 | Hematite<br>054 | Tilted | 972  | 1002 |

|    |                        |                                  |      |      |
|----|------------------------|----------------------------------|------|------|
| 55 | <i>Hematite</i><br>055 | <i>Flat</i>                      | 1032 | 1064 |
| 56 | <i>Hematite</i><br>056 | <i>Tilted and</i><br><i>Sunk</i> | 639  | 659  |
| 57 | <i>Hematite</i><br>057 | <i>Flat</i>                      | 1044 | 1077 |
| 58 | <i>Hematite</i><br>058 | <i>Flat</i>                      | 1110 | 1145 |
| 59 | <i>Hematite</i><br>059 | <i>Tilted</i>                    | 872  | 899  |
| 60 | <i>Hematite</i><br>060 | <i>Flat</i>                      | 1052 | 1085 |
| 61 | <i>Hematite</i><br>061 | <i>Flat</i>                      | 1089 | 1123 |
| 62 | <i>Hematite</i><br>062 | <i>Flat</i>                      | 1055 | 1088 |
| 63 | <i>Hematite</i><br>063 | <i>Flat</i>                      | 881  | 908  |
| 64 | <i>Hematite</i><br>064 | <i>Flat</i>                      | 1010 | 1041 |
| 65 | <i>Hematite</i><br>065 | <i>Tilted</i>                    | 895  | 923  |
| 66 | <i>Hematite</i><br>066 | <i>Flat</i>                      | 1060 | 1093 |
| 67 | <i>Hematite</i>        | <i>Tilted</i>                    | 804  | 829  |

|    |                        |                                  |      |      |
|----|------------------------|----------------------------------|------|------|
|    | 066                    |                                  |      |      |
| 68 | <i>Hematite</i><br>066 | <i>Tilted and</i><br><i>Sunk</i> | 523  | 539  |
| 69 | <i>Hematite</i><br>067 | <i>Flat</i>                      | 1080 | 1114 |
| 70 | <i>Hematite</i><br>068 | <i>Flat</i>                      | 900  | 928  |
| 71 | <i>Hematite</i><br>069 | <i>Tilted and</i><br><i>Sunk</i> | 578  | 596  |
| 72 | <i>Hematite</i><br>070 | <i>Tilted</i>                    | 782  | 806  |
| 73 | <i>Hematite</i><br>071 | <i>Flat</i>                      | 948  | 978  |
| 74 | <i>Hematite</i><br>072 | <i>Flat</i>                      | 1003 | 1034 |
| 75 | <i>Hematite</i><br>073 | <i>Flat</i>                      | 1084 | 1118 |
| 76 | <i>Hematite</i><br>073 | <i>Flat</i>                      | 1100 | 1134 |
| 77 | <i>Hematite</i><br>073 | <i>Flat</i>                      | 1066 | 1099 |
| 78 | <i>Hematite</i><br>074 | <i>Tilted</i>                    | 792  | 817  |
| 79 | <i>Hematite</i><br>075 | <i>Tilted</i>                    | 877  | 904  |

|    |                        |               |      |      |
|----|------------------------|---------------|------|------|
| 80 | <i>Hematite</i><br>076 | <i>Flat</i>   | 1035 | 1067 |
| 81 | <i>Hematite</i><br>076 | <i>Flat</i>   | 1027 | 1059 |
| 82 | <i>Hematite</i><br>076 | <i>Flat</i>   | 1055 | 1088 |
| 83 | <i>Hematite</i><br>077 | <i>Flat</i>   | 1015 | 1047 |
| 84 | <i>Hematite</i><br>078 | <i>Flat</i>   | 1023 | 1055 |
| 85 | <i>Hematite</i><br>079 | <i>Flat</i>   | 1057 | 1090 |
| 86 | <i>Hematite</i><br>080 | <i>Flat</i>   | 1044 | 1077 |
| 87 | <i>Hematite</i><br>081 | <i>Flat</i>   | 1105 | 1139 |
| 88 | <i>Hematite</i><br>082 | <i>Tilted</i> | 867  | 894  |
| 89 | <i>Hematite</i><br>083 | <i>Tilted</i> | 710  | 732  |
| 90 | <i>Hematite</i><br>084 | <i>Tilted</i> | 832  | 858  |
| 91 | <i>Hematite</i><br>085 | <i>Flat</i>   | 873  | 900  |
| 92 | <i>Hematite</i>        | <i>Tilted</i> | 784  | 808  |

|     |                        |                                  |      |      |
|-----|------------------------|----------------------------------|------|------|
|     | 086                    |                                  |      |      |
| 93  | <i>Hematite</i><br>087 | <i>Tilted</i>                    | 743  | 766  |
| 94  | <i>Hematite</i><br>088 | <i>Flat</i>                      | 793  | 818  |
| 95  | <i>Hematite</i><br>089 | <i>Tilted and</i><br><i>Sunk</i> | 403  | 416  |
| 96  | <i>Hematite</i><br>090 | <i>Tilted</i>                    | 615  | 634  |
| 97  | <i>Hematite</i><br>091 | <i>Flat</i>                      | 867  | 894  |
| 98  | <i>Hematite</i><br>092 | <i>Tilted</i>                    | 801  | 826  |
| 99  | <i>Hematite</i><br>093 | <i>Flat</i>                      | 1017 | 1049 |
| 100 | <i>Hematite</i><br>094 | <i>Flat</i>                      | 1081 | 1115 |

**Table 1.** Tabulated SEM image analysis of particles trapped in PDMS after being assembled at a hexadecane-water interface.

The individual SEM files can be obtained from the authors upon request by email, or via <http://www.bonlab.info>

## References

[1] T. Sugimoto, M. M. Khan, A. Muramatsu, Coll. Surf. A. 2993, 70, 167.

\_[2] J. de Graaf, M. Dijkstra, R. van Roij, *Phys. Rev. E*, **2009**, 80, 1.

\_[3] E. Weinan, R. Weiqing, E. Vanden-Eijnden, *J. Chem. Phys*, **2007**, 126, 164103.
